# Supplementary material for: L-Arginine Modulates T Cell Metabolism and Enhances Survival and Anti-tumor Activity
Source: PubMed Central journal article supplement — Cell. 2016 Oct 20;167(3):829–842.e13. doi: 10.1016/j.cell.2016.09.031 (PMC5075284; doi:10.1016/j.cell.2016.09.031), 2016-10-20
Supplement: mmc6.pdf [file mmc6.pdf]

**Supplemental Table 6. sgRNAs used in this study**

| Target | sg | Target sequence            |
|--------|----|----------------------------|
| SIRT1  | 1  | TCG TAC AAG TTG TCG GCC AG |
| SIRT1  | 2  | CAG ATT AGT AGG CGG CTT GA |
| SIRT1  | 3  | TAC CCA GAA CAT AGA CAC GC |
| ACIN1  | 1  | GAG TTC TGA GTG GTA ATC GA |
| ACIN1  | 2  | GGT ACT CGG GTC CGT CCC GA |
| B2M    | 1  | GAG TAG CGC GAG CAC AGC TA |
| B2M    | 2  | CCT GAA TCT TTG GAG TAC GC |
| BAZ1B  | 1  | AGT ATG AAG CCC GCT TGG AA |
| BAZ1B  | 2  | ATT TGG ACG TGC AAG AGT AC |
| BAZ1B  | 3  | AAC GGC TTC ACC AGC GGG AA |
| BAZ1B  | 4  | AAA GGT ACA GTG AGC GCA TT |
| PTPN6  | 1  | GGT TTC ACC GAG ACC TCA GT |
| PTPN6  | 2  | GGA CAC CTC GGC CCT TGA GC |
| PSIP1  | 1  | ATG ACT CGC GAT TTC AAA CC |
| PSIP1  | 2  | AAA AGA GCC GGA TAA AAA AG |
| SSB    | 1  | TCC TTT AGA AAC TTG TCC CG |
| SSB    | 2  | GGA TGA AGG CTG GGT ACC TT |
| TSN    | 1  | TGA AAT CCT TTC TCC CGA TC |
| TSN    | 2  | AAC CTG TAA TAC TGT TCA GC |
| XRCC6  | 1  | CTC TGC TTC TTC ATC GCC CT |
| XRCC6  | 2  | ATC CGT GGC CCA TCA TGT CT |
